# Supplementary material for: Structure of human PIEZO1 and its slow-inactivating channelopathy mutants
Source: eLife. 2025 Jul 16;13:RP101923. doi: 10.7554/eLife.101923 (PMC12266723; doi:10.7554/eLife.101923)
Supplement: Figure 1—figure supplement 1—source data 1. [file elife-101923-fig1-figsupp1-data1.xlsx]

## Sheet: Figure 1-figure supplement 2b
		Figure 1-figure supplement 2b-source data 1

## Sheet: Figure 1-figure supplement 2c,d
		Figure 1-figure supplement 2c,d-source data 1

## Sheet: Figure 1-figure supplement 2e
		Figure 1-figure supplement 2e-source data 1

## Sheet: Figure 1-figure supplement 2f
		Figure 1-figure supplement 2f-source data 1

## Sheet: Figure 1-figure supplement 2g
		Figure 1-figure supplement 2g-source data 1

## Sheet: Figure 1-figure supplement 2h
		Figure 1-figure supplement 2h-source data 1

## Sheet: Figure 1-figure supplement 2i
			Figure 1-figure supplement 2i-source data 1
